# Supplementary material
Source: publisher figshare collection journal article supplement (https://karger.figshare.com/articles/dataset/_/4857887)
Supplement: Supplementary file 3 [file 1]

Supplementary table 1. Correlation coefficients between each ERBB ligands expressions in TCGA data.

|       | HBEGF         | AREG           | EREG           | BTC           | EGF            |
|-------|---------------|----------------|----------------|---------------|----------------|
| TGFA  | 0.216( 0.001) | 0.324 (<0.001) | 0.216 (<0.001) | 0.047 (0.345) | 0.037 (0.456)  |
| HBEGF |               | 0.460 (<0.001) | 0.282 (0.005)  | 0.112 (0.024) | 0.041 (0.409)  |
| AREG  |               |                | 0.611 (<0.001) | 0.072 (0.145) | 0.102 (0.040)  |
| EREG  |               |                |                | 0.076 (0.125) | 0.206 (<0.001) |
| BTC   |               |                |                |               | 0.032 (0.524)  |

The parenthesized value is p-value.

Supplementary table 2. Correlation coefficients between each ERBB ligands expressions in ACRG data.

|       | HBEGF         | AREG           | EREG           | BTC            | EGF            |
|-------|---------------|----------------|----------------|----------------|----------------|
| TGFA  | 0.148 (0.010) | 0.296 (<0.001) | 0.173 (0.003)  | 0.054 (0.348)  | 0.033 (0.572)  |
| HBEGF |               | 0.385 (<0.001) | 0.213 (<0.001) | -0.014 (0.806) | -0.004 (0.950) |
| AREG  |               |                | 0.590 (<0.001) | 0.108 (0.061)  | -0.019 (0.749) |
| EREG  |               |                |                | -0.119 (0.040) | 0.001 (0.983)  |
| BTC   |               |                |                |                | -0.106 (0.067) |

The parenthesized value is p-value.

Supplementary table 3. Cox proportional analysis results of univariate and multivariate in overall survival and stage II/III patients

|                                                         | Multivariate        |          |                     |          |
|---------------------------------------------------------|---------------------|----------|---------------------|----------|
|                                                         | All parameters      | <i>p</i> | Model selection     | <i>p</i> |
| TNM(II vs. III)                                         | 4.528 (2.485-8.249) | <0.001   | 4.758 (2.617-8.649) | <0.001   |
| Sex (Male vs. female)                                   | 1.425 (0.841-2.413) | 0.188    | 1.521 (0.921-2.511) | 0.101    |
| Age (<60 vs. ≥60)                                       | 1.773 (1.096-2.870) | 0.020    | 1.663 (1.049-2.638) | 0.031    |
| Lauren's classification (intestinal vs. non-intestinal) | 1.256 (0.755-2.092) | 0.380    |                     |          |
| EBV (negative vs. positive)                             | 2.056 (0.815-5.183) | 0.127    | 2.229 (0.922-5.387) | 0.075    |
| MSI (non-MSI vs. MSI)                                   | 0.301 (0.101-0.896) | 0.031    | 0.339 (0.119-0.969) | 0.044    |
| EGFR                                                    | 0.969 (0.439-2.136) | 0.937    |                     |          |
| ERBB2                                                   | 0.981 (0.413-2.331) | 0.966    |                     |          |
| ERBB3                                                   | 0.422 (0.125-1.430) | 0.166    | 0.441 (0.134-1.451) | 0.178    |
| TGFA                                                    | 0.601 (0.297-1.216) | 0.157    | 0.544 (0.282-1.047) | 0.069    |
| HBEGF                                                   | 1.627 (0.804-3.294) | 0.176    | 1.766 (0.916-3.408) | 0.090    |
| AREG                                                    | 1.732 (1.010-2.969) | 0.046    | 1.841 (1.160-2.923) | 0.010    |
| EREG                                                    | 1.105 (0.604-2.022) | 0.746    |                     |          |
| BTC                                                     | 1.337 (0.655-2.730) | 0.425    |                     |          |
| EGF                                                     | 1.273 (0.521-3.109) | 0.597    |                     |          |
| All parameters                                          |                     | <0.001   |                     | <0.001   |

Supplementary table 4. Cox proportional analysis results of univariate and multivariate in overall survival and EGFR-positive patients

|                                                         | Multivariate          |          |                       |          |
|---------------------------------------------------------|-----------------------|----------|-----------------------|----------|
|                                                         | All parameters        | <i>p</i> | Model selection       | <i>p</i> |
| TNM (I/II vs. III/IV)                                   | 57.19 (3.284-995.958) | 0.006    | 62.73 (5.627-699.280) | 0.001    |
| Sex (Male vs. female)                                   | 0.913 (0.053-15.817)  | 0.950    |                       |          |
| Age (<60 vs. ≥60)                                       | 1.058 (0.063-17.80)   | 0.969    |                       |          |
| Lauren's classification (intestinal vs. non-intestinal) | 6.663 (0.410-108.363) | 0.183    | 4.689 (1.126-19.54)   | 0.034    |
| EBV (negative vs. positive)                             | 1.712 (0.004-820.198) | 0.864    |                       |          |
| MSI (non-MSI vs. MSI)                                   | 0.687 (0.023-20.405)  | 0.828    |                       |          |
| ERBB2                                                   | 5.845 (0.060-572.924) | 0.450    | 7.540 (1.508-37.70)   | 0.014    |
| ERBB3                                                   | <0.001 (0 – infinity) | 0.998    | <0.001 (0 – infinity) | 0.998    |
| TGFA                                                    | 0.533 (0.044-6.493)   | 0.622    |                       |          |
| HBEGF                                                   | 0.957 (0.070-13.101)  | 0.974    |                       |          |
| AREG                                                    | 6.967 (0.192-253.038) | 0.290    | 6.163 (0.666-57.01)   | 0.109    |
| EREG                                                    | 4.655 (0.294-73.836)  | 0.275    | 5.790 (1.361-24.63)   | 0.017    |
| BTC                                                     | 3.584 (0.136-94.424)  | 0.444    |                       |          |
| EGF                                                     | 1.128 (0.073-17.404)  | 0.931    |                       |          |
| All parameters                                          |                       | <0.001   |                       | <0.001   |
